# Supplementary material for: Temporal Trends in Sports Participation among Adolescents between 2001 and 2015: A French School- and Territory-Based Study
Source: MDPI journal article supplement (doi:10.3390/ijerph15071335), 2018-06-26
Supplement: s1 [file s1]

# Supplementary Materials: Temporal Trends in Sports Participation among Adolescents between 2001 and 2015: A French School- and Territory-Based Study

Maxime Luiggi \*, Maxime Travert and Jean Griffet

**Table S1.** List of sport activities practiced by adolescents by year and considered as sport according to council of Europe definition.

| Year<br>SPORT         | 2001 |       | 2008 |       | 2015 |       |
|-----------------------|------|-------|------|-------|------|-------|
|                       | n    | %     | n    | %     | n    | %     |
| AEROBIC               | 0    | 0.0%  | 0    | 0.0%  | 2    | 0.3%  |
| AIKIDO                | 5    | 0.7%  | 0    | 0.0%  | 3    | 0.4%  |
| AIRSOFT               | 2    | 0.3%  | 0    | 0.0%  | 1    | 0.1%  |
| AMERICAN FOOTBALL     | 0    | 0.0%  | 1    | 0.1%  | 2    | 0.3%  |
| ARCHERY               | 0    | 0.0%  | 1    | 0.1%  | 0    | 0.0%  |
| ARTISTIC GYMNASTIC    | 0    | 0.0%  | 0    | 0.0%  | 4    | 0.6%  |
| ATHLETICS             | 14   | 2.0%  | 8    | 0.8%  | 9    | 1.3%  |
| BADMINTON             | 13   | 1.9%  | 13   | 1.4%  | 23   | 3.4%  |
| BALLET DANCE          | 0    | 0.0%  | 0    | 0.0%  | 5    | 0.7%  |
| BASEBALL              | 0    | 0.0%  | 1    | 0.1%  | 0    | 0.0%  |
| BASKET-BALL           | 40   | 5.8%  | 42   | 4.4%  | 38   | 5.7%  |
| BIKING                | 0    | 0.0%  | 34   | 3.6%  | 4    | 0.6%  |
| BMX                   | 2    | 0.3%  | 0    | 0.0%  | 4    | 0.6%  |
| BMX BICROSS           | 0    | 0.0%  | 0    | 0.0%  | 1    | 0.1%  |
| BODYBOARD             | 2    | 0.3%  | 1    | 0.1%  | 0    | 0.0%  |
| BODYBUILDING          | 12   | 1.7%  | 21   | 2.2%  | 26   | 3.9%  |
| BOXING                | 25   | 3.6%  | 12   | 1.3%  | 30   | 4.5%  |
| BULLFIGHTING          | 0    | 0.0%  | 2    | 0.2%  | 0    | 0.0%  |
| CANYONING             | 0    | 0.0%  | 1    | 0.1%  | 0    | 0.0%  |
| CAPOEIRA              | 0    | 0.0%  | 2    | 0.2%  | 0    | 0.0%  |
| CLIMBING              | 19   | 2.7%  | 23   | 2.4%  | 8    | 1.2%  |
| CROSS-COUNTRY CYCLING | 1    | 0.1%  | 1    | 0.1%  | 2    | 0.3%  |
| DANCING               | 75   | 10.8% | 102  | 10.8% | 105  | 15.7% |
| FENCING               | 0    | 0.0%  | 2    | 0.2%  | 2    | 0.3%  |
| FIGURE SKATING        | 0    | 0.0%  | 0    | 0.0%  | 1    | 0.1%  |
| FITNESS               | 10   | 1.4%  | 14   | 1.5%  | 12   | 1.8%  |
| FLAG FOOTBALL         | 1    | 0.1%  | 1    | 0.1%  | 0    | 0.0%  |
| FREE-DIVING           | 1    | 0.1%  | 1    | 0.1%  | 0    | 0.0%  |
| FRENCH BOXING         | 3    | 0.4%  | 0    | 0.0%  | 6    | 0.9%  |
| GOLF                  | 0    | 0.0%  | 2    | 0.2%  | 1    | 0.1%  |
| GYMNASTIC             | 9    | 1.3%  | 7    | 0.7%  | 9    | 1.3%  |
| HANDBALL              | 10   | 1.4%  | 8    | 0.8%  | 9    | 1.3%  |
| HIKING                | 0    | 0.0%  | 2    | 0.2%  | 0    | 0.0%  |
| HIP-HOP DANCE         | 1    | 0.1%  | 0    | 0.0%  | 6    | 0.9%  |
| HORSE RIDING          | 24   | 3.5%  | 28   | 3.0%  | 24   | 3.6%  |
| ICE HOCKEY            | 1    | 0.1%  | 1    | 0.1%  | 3    | 0.4%  |
| ICE SKATING           | 2    | 0.3%  | 4    | 0.4%  | 1    | 0.1%  |
| JUDO                  | 7    | 1.0%  | 4    | 0.4%  | 9    | 1.3%  |
| JUJITSU               | 0    | 0.0%  | 0    | 0.0%  | 2    | 0.3%  |

|                         |     |       |     |       |     |       |
|-------------------------|-----|-------|-----|-------|-----|-------|
| KARATE                  | 8   | 1.2%  | 8   | 0.8%  | 9   | 1.3%  |
| KAYAK                   | 1   | 0.1%  | 1   | 0.1%  | 1   | 0.1%  |
| KENDO                   | 0   | 0.0%  | 0   | 0.0%  | 1   | 0.1%  |
| KRAV MAGA               | 0   | 0.0%  | 0   | 0.0%  | 1   | 0.1%  |
| KUNG-FU                 | 2   | 0.3%  | 3   | 0.3%  | 1   | 0.1%  |
| LATIN DANCE             | 0   | 0.0%  | 0   | 0.0%  | 1   | 0.1%  |
| LONGBOARDING            | 0   | 0.0%  | 0   | 0.0%  | 1   | 0.1%  |
| MARTIAL ARTS            | 6   | 0.9%  | 25  | 2.6%  | 2   | 0.3%  |
| MIXED-MARTIAL ARTS      | 0   | 0.0%  | 0   | 0.0%  | 1   | 0.1%  |
| MODERN JAZZ DANCE       | 1   | 0.1%  | 0   | 0.0%  | 2   | 0.3%  |
| MOTOCROSS RIDING        | 0   | 0.0%  | 0   | 0.0%  | 3   | 0.4%  |
| MOTORCYCLE SPORT        | 1   | 0.1%  | 1   | 0.1%  | 0   | 0.0%  |
| ORIENTAL DANCE          | 0   | 0.0%  | 0   | 0.0%  | 1   | 0.1%  |
| ORIENTEERING RACE       | 0   | 0.0%  | 0   | 0.0%  | 2   | 0.3%  |
| PADEL                   | 1   | 0.1%  | 1   | 0.1%  | 0   | 0.0%  |
| PAINTBALL               | 2   | 0.3%  | 1   | 0.1%  | 0   | 0.0%  |
| PARKOUR                 | 0   | 0.0%  | 0   | 0.0%  | 3   | 0.4%  |
| PETANQUE (FRENCH BOWLS) | 2   | 0.3%  | 1   | 0.1%  | 0   | 0.0%  |
| POWER TRAINING          | 0   | 0.0%  | 0   | 0.0%  | 1   | 0.1%  |
| QUAD                    | 0   | 0.0%  | 1   | 0.1%  | 0   | 0.0%  |
| RESCUE SWIMMING         | 0   | 0.0%  | 1   | 0.1%  | 1   | 0.1%  |
| ROAD BYCYCLE RACING     | 21  | 3.0%  | 0   | 0.0%  | 2   | 0.3%  |
| ROLLER HOCKEY           | 0   | 0.0%  | 0   | 0.0%  | 1   | 0.1%  |
| ROLLER SKATING          | 7   | 1.0%  | 8   | 0.8%  | 1   | 0.1%  |
| ROWING                  | 6   | 0.9%  | 4   | 0.4%  | 1   | 0.1%  |
| RUGBY FOOTBALL          | 12  | 1.7%  | 15  | 1.6%  | 22  | 3.3%  |
| RUNNING                 | 24  | 3.5%  | 93  | 9.8%  | 21  | 3.1%  |
| RYTHMIC GYMNASTIC       | 1   | 0.1%  | 2   | 0.2%  | 2   | 0.3%  |
| SAILING                 | 0   | 0.0%  | 10  | 1.1%  | 1   | 0.1%  |
| SAMBO BOXING            | 1   | 0.1%  | 0   | 0.0%  | 1   | 0.1%  |
| SCUBA DIVING            | 0   | 0.0%  | 5   | 0.5%  | 0   | 0.0%  |
| SELF DEFENSE            | 1   | 0.1%  | 1   | 0.1%  | 2   | 0.3%  |
| SHOOTING SPORT          | 0   | 0.0%  | 0   | 0.0%  | 1   | 0.1%  |
| SKATEBOARDING           | 9   | 1.3%  | 19  | 2.0%  | 6   | 0.9%  |
| SKIING                  | 16  | 2.3%  | 2   | 0.2%  | 6   | 0.9%  |
| SNOWBOARDING            | 13  | 1.9%  | 1   | 0.1%  | 0   | 0.0%  |
| SOCCER                  | 134 | 19.3% | 198 | 20.9% | 115 | 17.2% |
| SQUASH                  | 0   | 0.0%  | 2   | 0.2%  | 5   | 0.7%  |
| SURFING                 | 3   | 0.4%  | 3   | 0.3%  | 2   | 0.3%  |
| SWIMMING                | 39  | 5.6%  | 47  | 5.0%  | 29  | 4.3%  |
| SYNCHRONIZED SWIMMING   | 5   | 0.7%  | 5   | 0.5%  | 2   | 0.3%  |
| TABLE TENNIS            | 3   | 0.4%  | 5   | 0.5%  | 2   | 0.3%  |
| TAEKWONDO               | 4   | 0.6%  | 5   | 0.5%  | 4   | 0.6%  |
| TENNIS                  | 54  | 7.8%  | 69  | 7.3%  | 29  | 4.3%  |
| THAI BOXING             | 1   | 0.1%  | 0   | 0.0%  | 8   | 1.2%  |
| TRAMPOLINING            | 0   | 0.0%  | 0   | 0.0%  | 2   | 0.3%  |
| TRIATHLON               | 0   | 0.0%  | 1   | 0.1%  | 0   | 0.0%  |
| ULTIMATE FRISBEE        | 0   | 0.0%  | 1   | 0.1%  | 0   | 0.0%  |
| VOLLEYBALL              | 21  | 3.0%  | 22  | 2.3%  | 13  | 1.9%  |
| WALKING                 | 0   | 0.0%  | 27  | 2.8%  | 0   | 0.0%  |
| WATERPOLO               | 2   | 0.3%  | 3   | 0.3%  | 0   | 0.0%  |
| WINDSURFING             | 13  | 1.9%  | 18  | 1.9%  | 3   | 0.4%  |

|               |            |               |            |               |            |               |
|---------------|------------|---------------|------------|---------------|------------|---------------|
| YOGA          | 0          | 0.0%          | 0          | 0.0%          | 1          | 0.1%          |
| YOSEIKAN BUDO | 0          | 0.0%          | 0          | 0.0%          | 1          | 0.1%          |
| ZUMBA DANCE   | 1          | 0.1%          | 0          | 0.0%          | 4          | 0.6%          |
| <b>All</b>    | <b>694</b> | <b>100.0%</b> | <b>948</b> | <b>100.0%</b> | <b>670</b> | <b>100.0%</b> |

Note. In 2001, 694 adolescents play sport at least one hour per week. Of them 21 (3.0%) declared that Volley-Ball is their preferred sport activity.

**Table S2.** List of sport activities practiced by adolescents by year and no considered as sport according to Council of Europe definition.

| Year<br>SPORT                | 2001     |               | 2008     |             | 2015     |               |
|------------------------------|----------|---------------|----------|-------------|----------|---------------|
|                              | n        | %             | n        | %           | n        | %             |
| ELDOA                        | 1        | 100.0%        | 0        | 0.0%        | 1        | 25.0%         |
| YOUNG SPECIAL FORCE TRAINING | 0        | 0.0%          | 0        | 0.0%        | 1        | 25.0%         |
| YOUNG FIREFIGHTERS TRAINING  | 0        | 0.0%          | 0        | 0.0%        | 1        | 25.0%         |
| KPM                          | 0        | 0.0%          | 0        | 0.0%        | 1        | 25.0%         |
| <b>All</b>                   | <b>1</b> | <b>100.0%</b> | <b>0</b> | <b>0.0%</b> | <b>4</b> | <b>100.0%</b> |

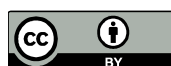

© 2018 by the authors; licensee MDPI, Basel, Switzerland. This article is an open access article distributed under the terms and conditions of the Creative Commons by Attribution (CC-BY) license (<http://creativecommons.org/licenses/by/4.0/>).
